# Supplementary material for: Facile Transfer of Spray-Coated Ultrathin AgNWs Composite onto the Skin for Electrophysiological Sensors
Source: MDPI journal article supplement (doi:10.3390/nano13172467), 2023-08-31
Supplement: s1 [file s1]

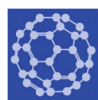

Supplementary Materials

# Facile Transfer of Spray-Coated Ultrathin AgNWs Composite onto the Skin for Electrophysiological Sensors

Minwoo Lee <sup>†</sup>, Jaeseong Kim <sup>†</sup>, Myat Thet Khine, Sunkook Kim <sup>\*</sup> and Srinivas Gandla <sup>\*</sup>

Multifunctional Nano Bio Electronics Lab, Department of Advanced Materials Science and Engineering, Sungkyunkwan University, Suwon 16419, Republic of Korea; alchemist@skku.edu (M.L.); j2castle@naver.com (J.K.); myatthetkhine0997@gmail.com (M.T.K.)

<sup>\*</sup>Correspondence: seonkuk@skku.edu (S.K.); srinivas@skku.edu (S.G.)

<sup>†</sup> These authors contributed equally to this work.

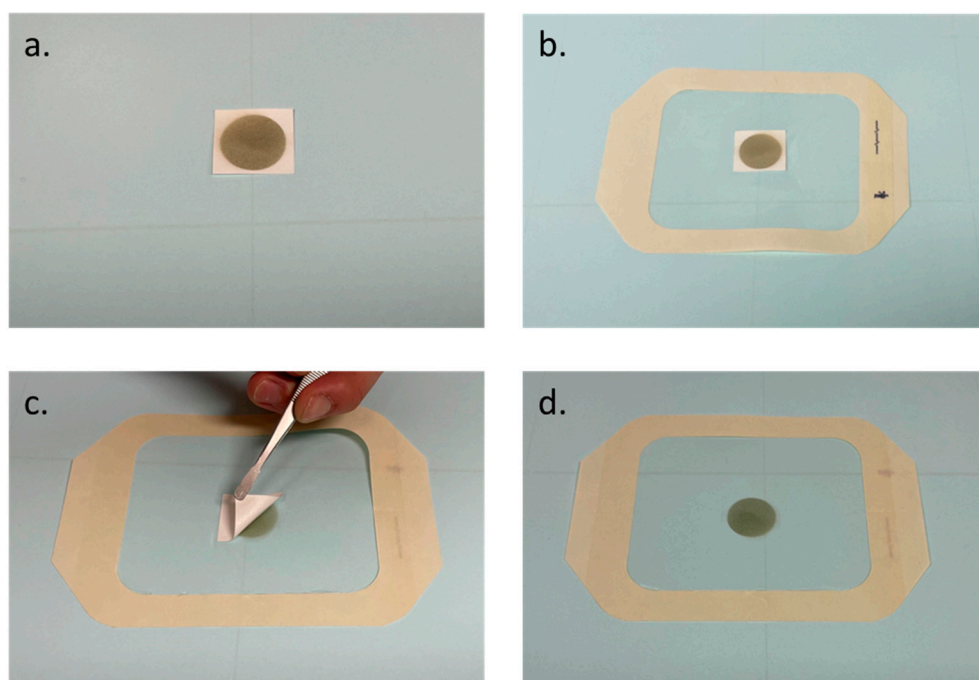

**Figure S1.** Transfer of AgNWs-based electrode to Tegaderm tape. (a) AgNWs on glossy paper, (b) placing Tegaderm on AgNWs, (c) removal of glossy paper, and (d) complete transfer of AgNWs to Tegaderm.

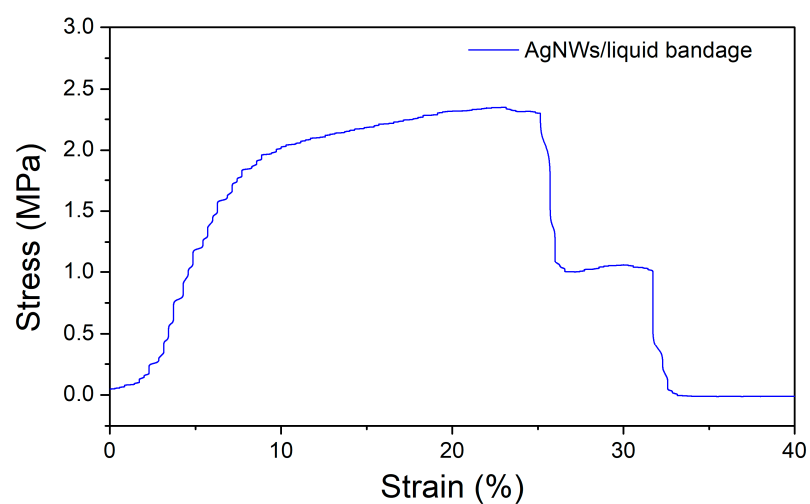

**Figure S2.** Stress-strain curve of the liquid bandage supported AgNWs-based film; film length, width, and thickness are 7 mm, 9 mm, and 3  $\mu\text{m}$ . The film has a Young's modulus of  $\sim 0.45$  MPa in the linear region.

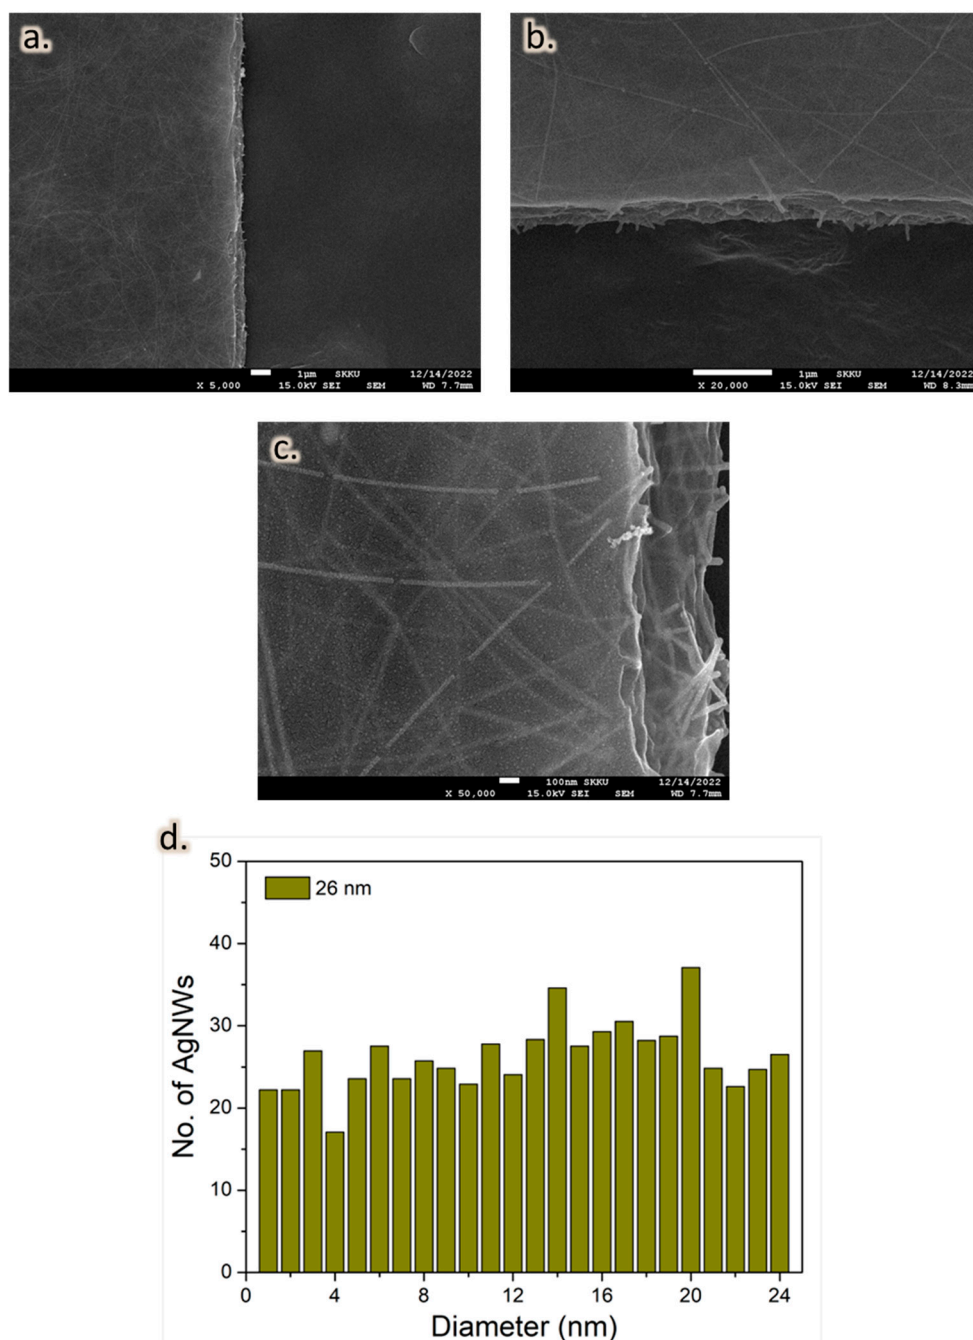

**Figure S3.** (a-c) SEM micrographs of the spray-coated AgNWs and hydroxypropyl methylcellulose composite solution, at different magnifications and angles. (d) The Distribution of the number of AgNWs by diameter (mean of 26.3 nm).

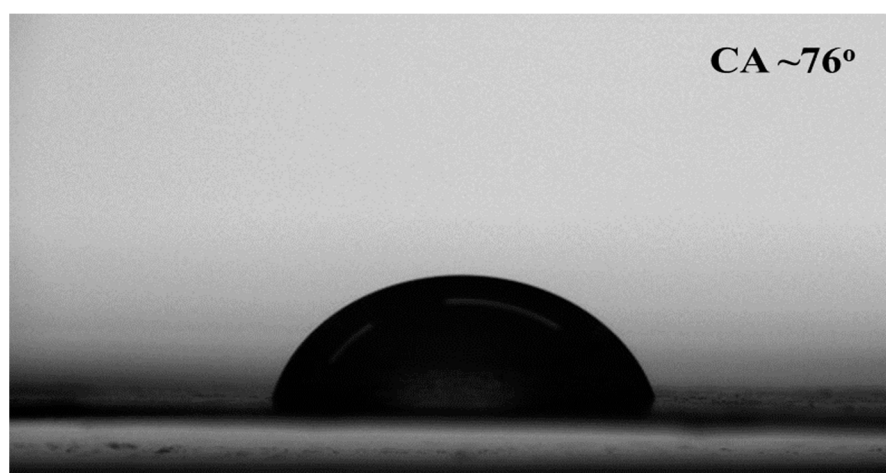

**Figure S4.** CA of DI water droplet on glossy paper.

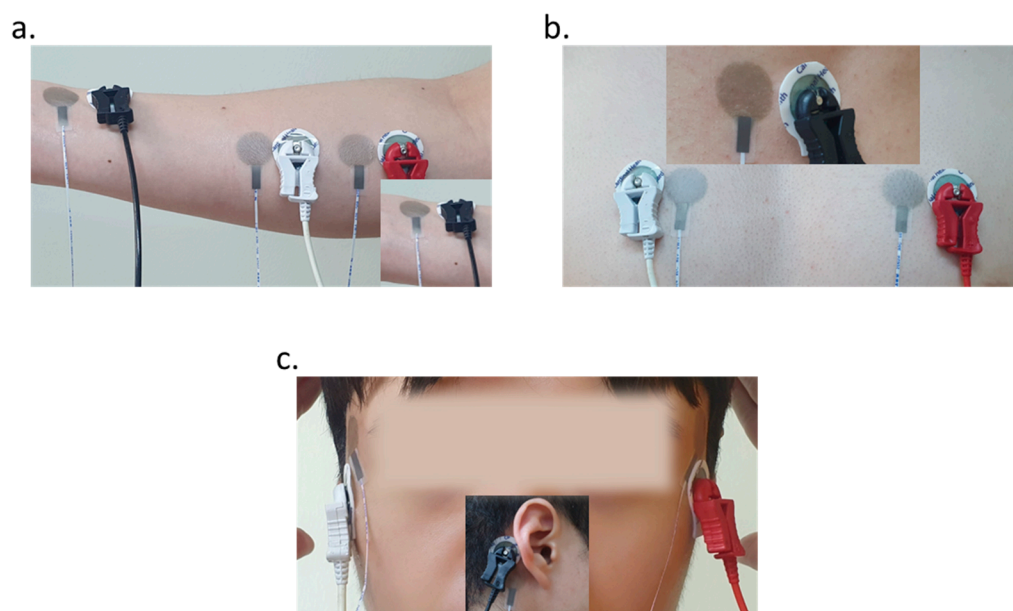

**Figure S5.** Conventional and AgNWs-based electrodes position on the human skin. (a) EMG, (b) ECG, and (c) EOG.

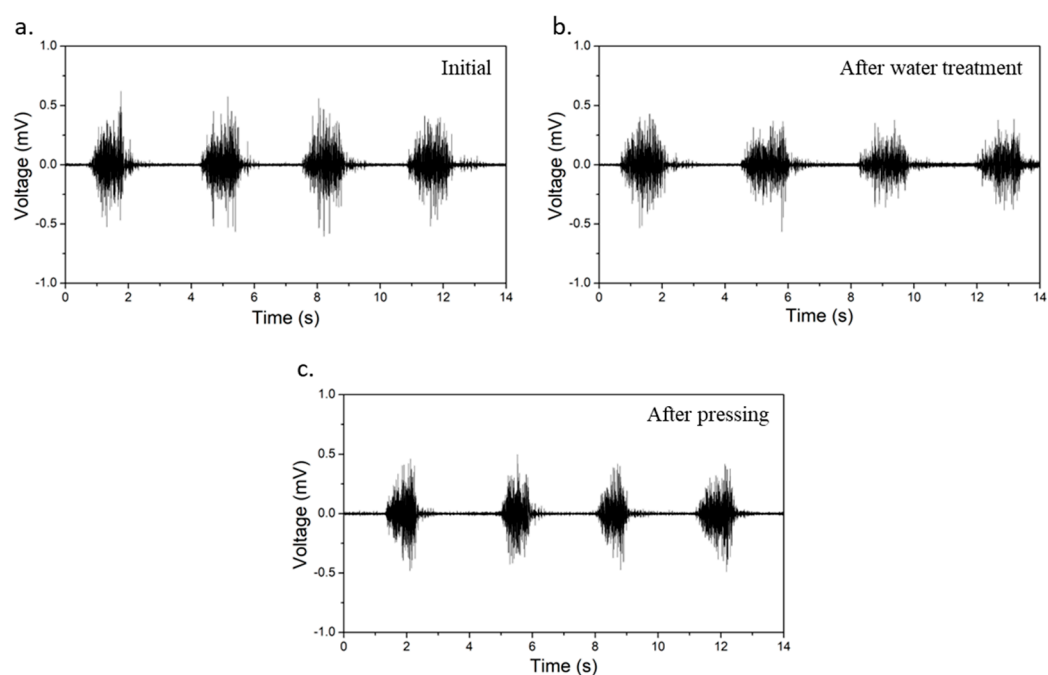

**Figure S6.** EMG signals measured before and after water treatment and pressing. (a) Initial, (b) after water treatment, and (c) after pressing.

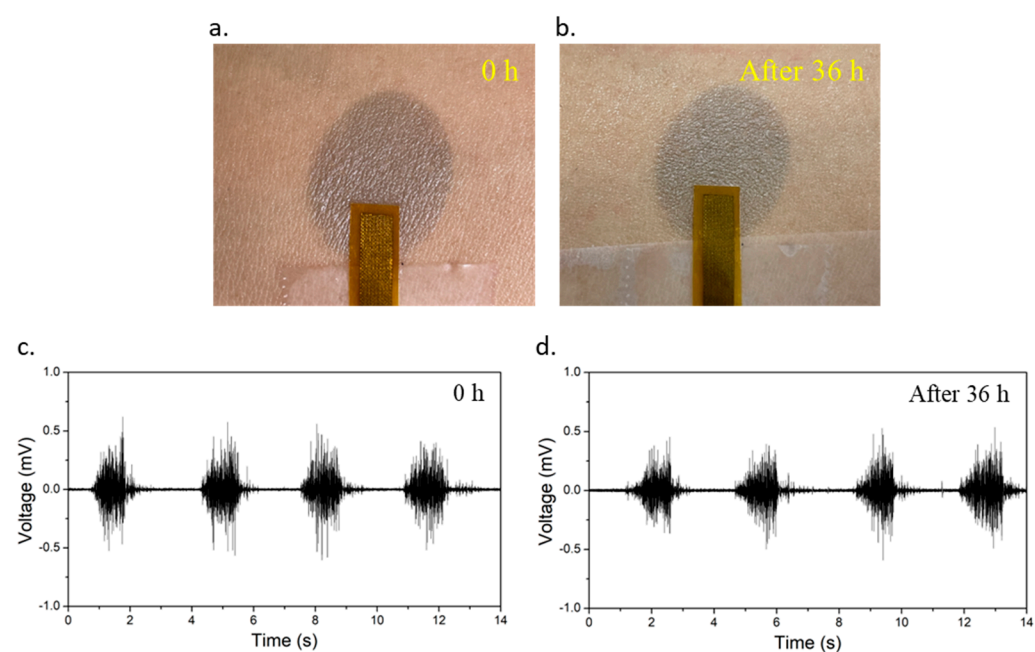

**Figure S7.** Long-term use of wearable AgNWs based sensor. (a,b) Photographed images of the sensor worn onto the skin captured (a) at 0 h and (b) after 36 h, with their corresponding measured (c,d) EMG signals.

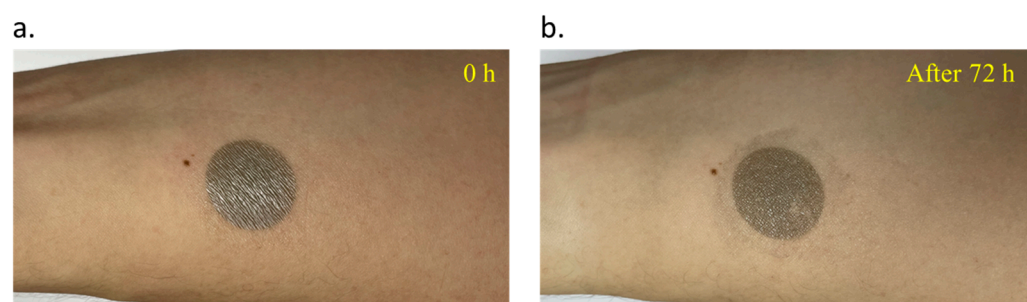

**Figure S8.** Wearable AgNWs-based sensor compatibility test with the skin. (a) 0 h and (b) after 72 h.

**Table S1.** Comparison of our work with previously reported research.

| Electronic device | Adhesive materials        | Transfer method                                | Transfer process of active materials [Direct/Indirect]                                | Active materials process                         | Ref.      |
|-------------------|---------------------------|------------------------------------------------|---------------------------------------------------------------------------------------|--------------------------------------------------|-----------|
| TENG              | 3M Nexcare Liquid Bandage | Spraying                                       | Indirect<br>(Graphene on Cu foil → etching Cu → PET → skin)                           | Graphene (CVD)                                   | [1]       |
| EMG, ECG, and EOG | 3M Tegaderm               | Taping                                         | Indirect<br>(Graphene on Cu foil → etching Cu → tattoo paper → skin)                  | Graphene (CVD)                                   | [2]       |
| EMG and ECG       | 3M Nexcare Liquid Bandage | Spraying                                       | Direct<br>(AgNWs on porous TPU → skin)                                                | AgNWs (dip-coating)                              | [3]       |
| ECG               | Water                     | Water drop                                     | Direct<br>(Au/Cr on PET → skin)                                                       | Au/Cr (thermal evaporation)                      | [4]       |
| EMG and ECG       | 3M Nexcare Liquid Bandage | Spraying                                       | Indirect<br>(Si nanomembrane on SOI → elastomeric stamp or PVA → skin)                | Si Nanomembrane (diffusion dopping on SOI wafer) | [5]       |
| EMG and ECG       | Water                     | Water drop (transferred with tattoo substrate) | Direct<br>(PEDOT:PSS on tattoo paper → skin)                                          | PEDOT:PSS (inkjet printing)                      | [6]       |
| TENG              | 3M Nexcare Liquid Bandage | Spraying                                       | Indirect<br>(PI/Cu/PI on PMMA → PMMA removal → PI/Cu/PI on water-soluble tape → skin) | Cu (sputtering)                                  | [7]       |
| EMG, ECG, and EOG | 3M Nexcare Liquid Bandage | Spraying                                       | Direct<br>(AgNWs on glossy paper → skin)                                              | AgNWs (spraying)                                 | This work |

## References

1. Chu, H.; Jang, H.; Lee, Y.; Chae, Y.; Ahn, J.H. Conformal, Graphene-Based Triboelectric Nanogenerator for Self-Powered Wearable Electronics. *Nano Energy* **2016**, *27*, 298–305, doi:10.1016/j.nanoen.2016.07.009.
2. Kireev, D.; Ameri, S.K.; Nederveld, A.; Kampfe, J.; Jang, H.; Lu, N.; Akinwande, D. Fabrication, Characterization and Applications of Graphene Electronic Tattoos. *Nat. Protoc.* **2021**, *16*, 2395–2417, doi:10.1038/s41596-020-00489-8.
3. Zhou, W.; Yao, S.; Wang, H.; Du, Q.; Ma, Y.; Zhu, Y. Gas-Permeable, Ultrathin, Stretchable Epidermal Electronics with Porous Electrodes. *ACS Nano* **2020**, *14*, 5798–5805, doi:10.1021/acsnano.0c00906.
4. Wang, Y.; Qiu, Y.; Ameri, S.K.; Jang, H.; Dai, Z.; Huang, Y.; Lu, N. Low-Cost, Mm-Thick, Tape-Free Electronic Tattoo Sensors with Minimized Motion and Sweat Artifacts. *npj Flex. Electron.* **2018**, *2*, 1–7.

- 
5. Yeo, W.-H.; Kim, Y.-S.; Lee, J.; Ameen, A.; Shi, L.; Li, M.; Wang, S.; Ma, R.; Jin, S.H.; Kang, Z.; et al. Multifunctional Epidermal Electronics Printed Directly Onto the Skin. *Adv. Mater.* **2013**, *25*, 2773–2778, doi:10.1002/adma.201204426.
  6. Taccola, S.; Poliziani, A.; Santonocito, D.; Mondini, A.; Denk, C.; Ide, A.N.; Oberparleiter, M.; Greco, F.; Mattoli, V. Toward the Use of Temporary Tattoo Electrodes for Impedancemetric Respiration Monitoring and Other Electrophysiological Recordings on Skin. *Sensors (Switzerland)* **2021**, *21*, 1–17, doi:10.3390/s21041197.
  7. Wong, T.H.; Liu, Y.; Li, J.; Yao, K.; Liu, S.; Yiu, C.K.; Huang, X.; Wu, M.; Park, W.; Zhou, J.; et al. Triboelectric Nanogenerator Tattoos Enabled by Epidermal Electronic Technologies. *Adv. Funct. Mater.* **2022**, *32*, 1–10, doi:10.1002/adfm.202111269.
